# Supplementary material for: A liquid metal/polypyrrole electrospun TPU composite conductive network for highly sensitive strain sensing in human motion monitoring
Source: Royal Society of Chemistry journal article supplement (doi:10.1039/d3tb02394j), 2024-01-01
Supplement: d3tb02394j1.pdf [file d3tb02394j1.pdf]

**A liquid metal/polypyrrole electrospun TPU composite conductive network for highly sensitive strain sensing in human motion monitoring**

Juan Du, Qinghui Han, Aibing Chen\*

*College of Chemical and Pharmaceutical Engineering, Hebei University of Science and Technology, 70 Yuhua Road, Shijiazhuang 050018, China.*

\*E-mail: *chen\_ab@163.com*

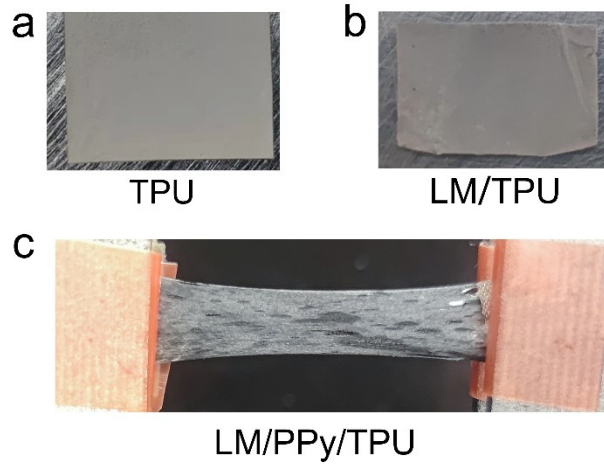

**Fig. S1.** **a** Electrospinning TPU optical photos. **b** LM/TPU optical photos. **c** LM/PPy/TPU optical photos.

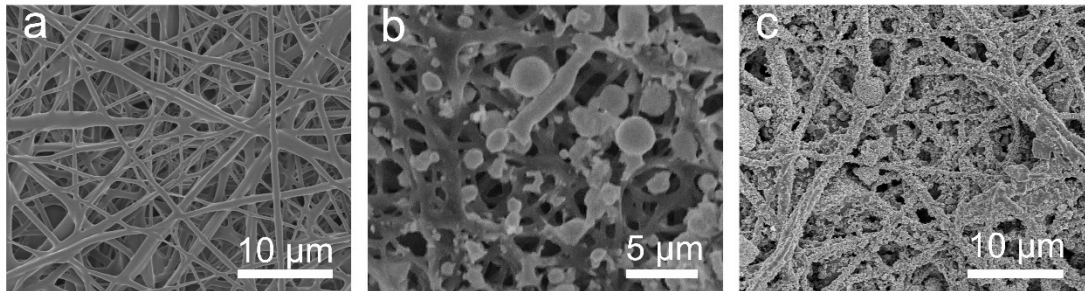

**Fig. S2.** **a** SEM image of electrospun TPU. **b** SEM image of LM/TPU composite film. **c** SEM image of LM/PPy/TPU composite film.

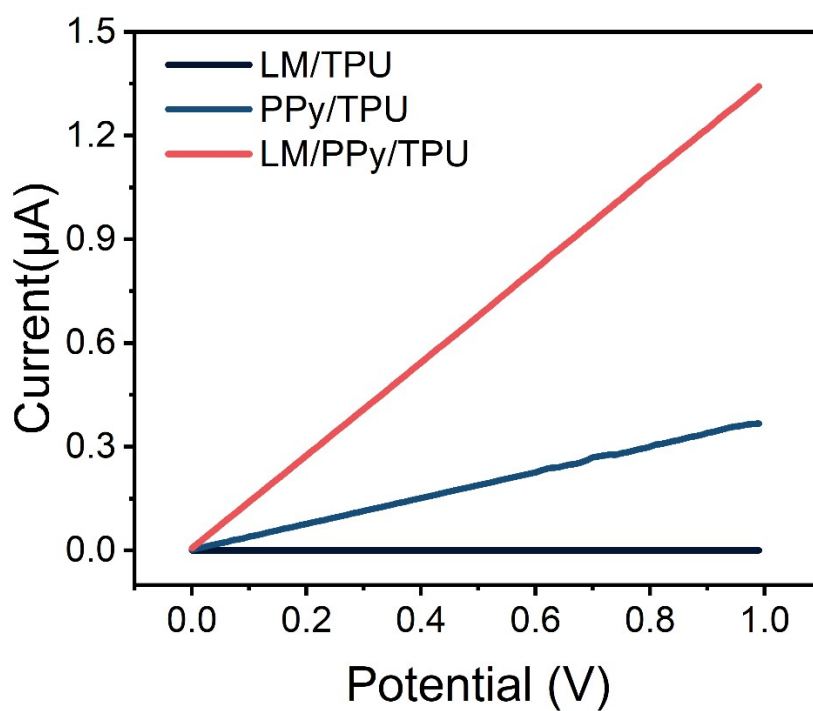

**Fig. S3.**  $I$ - $V$  curves of LM/TPU film, PPy/TPU composite film and the LM/PPy/TPU composite film.

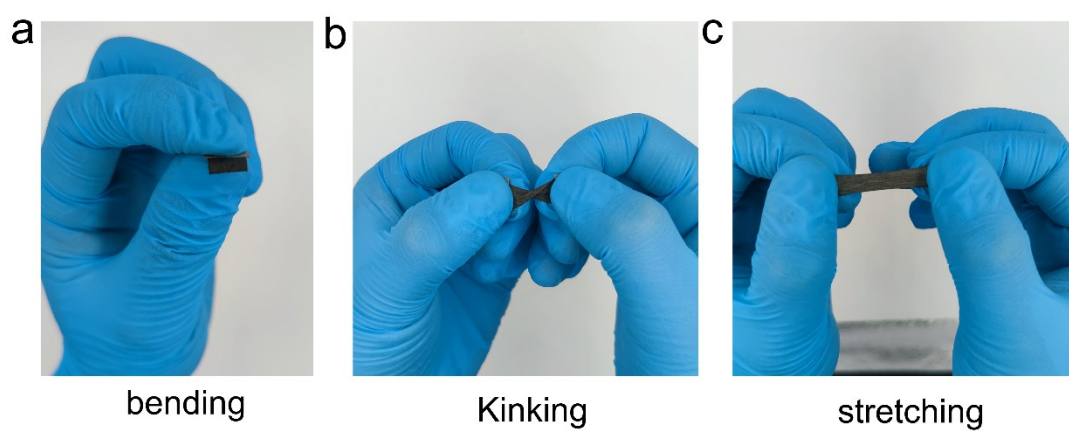

**Fig. S4.** **a** Photo of flexible strain sensor bending. **b** Photo of flexible strain sensor kinking. **c** Photo of flexible strain sensor stretching.

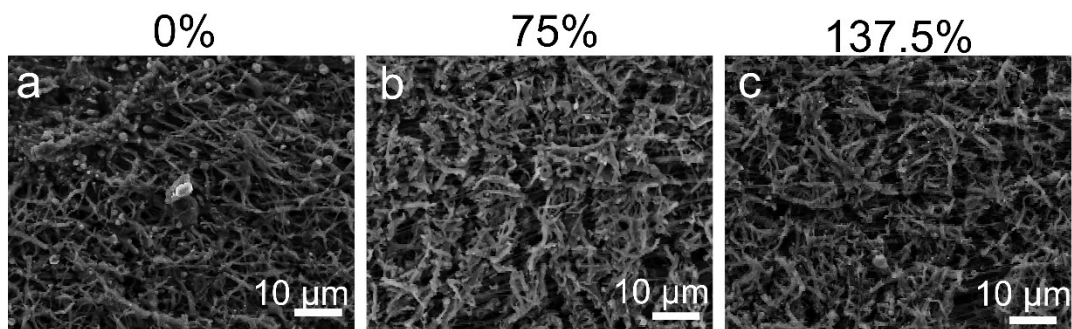

**Fig. S5.** SEM images of LM/PPy/TPU film under different tensile of 0%,75% and 137.5%.

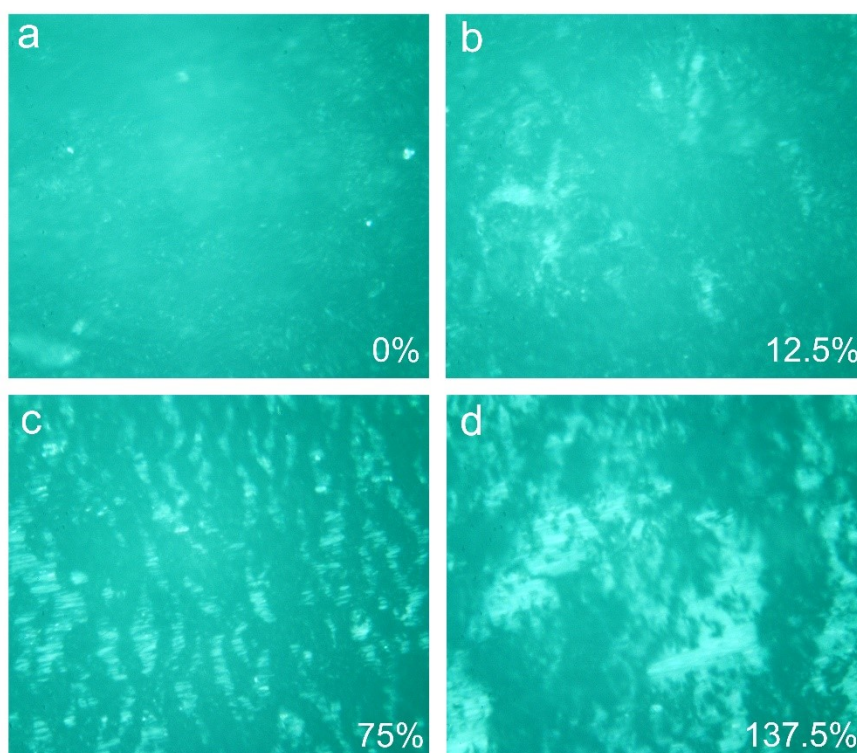

**Fig. S6.** Optical microscope images of LM/PPy/TPU film under different tensile of 0%,12.5% and 137.5%.

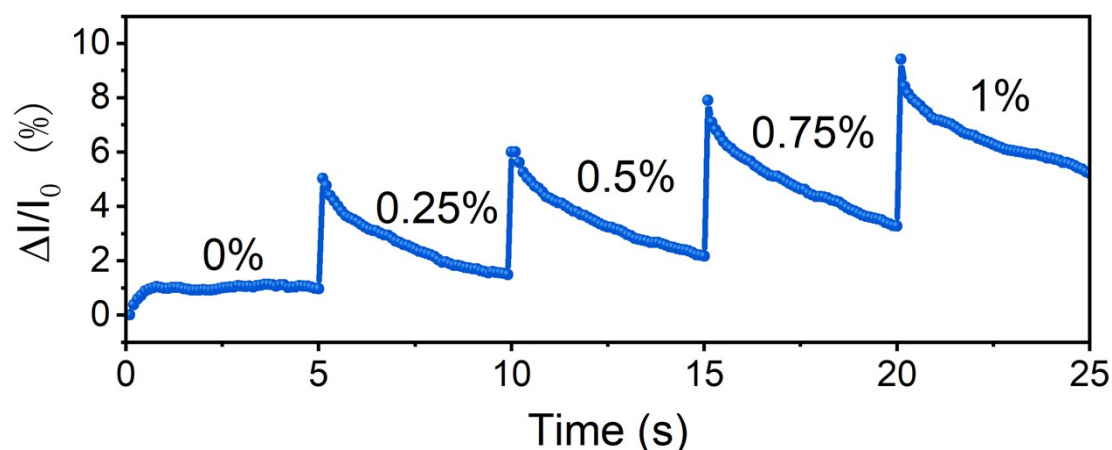

**Fig. S7.** Relative current change curve of LM/PPy/TPU stress sensor under 0% - 1% strain.

**Table S1.** Performance comparison of strain sensors based on liquid metal

| Sample  | Detectability | Sensitivity | Response time | Working range               | Ref.      |
|---------|---------------|-------------|---------------|-----------------------------|-----------|
| EGaIn   | 0.09%         | 4.91        | 116 ms        | $0 < \varepsilon < 320\%$   | 1         |
| EGaInSn | 0.3%          | 2.2         | --            | $0 < \varepsilon < 140\%$   | 2         |
| EGaIn   | 2.9%          | 0.66        | --            | $0 < \varepsilon < 100\%$   | 3         |
| EGaAu   | --            | 1           | --            | $0 < \varepsilon < 4\%$     | 4         |
| EGaInSn | 2.5%          | 4.36        | 180ms         | $0 < \varepsilon < 137.5\%$ | This work |

## References

- [1] Chen, J.; Zhang, J.; Luo, Z.; Zhang, J.; Li, L.; Su, Y.; Gao, X.; Li, Y.; Tang, W.; Cao, C.; Liu, Q.; Wang, L.; Li, H., Superelastic, Sensitive, and Low Hysteresis Flexible Strain Sensor Based on Wave-Patterned Liquid Metal for Human Activity Monitoring. *ACS Applied Materials & Interfaces* **2020**, *12* (19), 22200-22211.
- [2] Wu, Y.-h.; Zhen, R.-m.; Liu, H.-z.; Liu, S.-q.; Deng, Z.-f.; Wang, P.-p.; Chen, S.;

Liu, L., Liquid metal fiber composed of a tubular channel as a high-performance strain sensor. *Journal of Materials Chemistry C* **2017**, *5* (47), 12483-12491.

[3] Cooper, C. B.; Arutselvan, K.; Liu, Y.; Armstrong, D.; Lin, Y.; Khan, M. R.; Genzer, J.; Dickey, M. D., Stretchable Capacitive Sensors of Torsion, Strain, and Touch Using Double Helix Liquid Metal Fibers. *Advanced Functional Materials* **2017**, *27* (20), 1605630.

[4] Hirsch, A.; Michaud, H. O.; Gerratt, A. P.; de Mulatier, S.; Lacour, S. P., Intrinsically Stretchable Biphasic (Solid–Liquid) Thin Metal Films. *Advanced Materials* **2016**, *28* (22), 4507-4512.
